# Supplementary material
Source: Springer Nature journal article supplement (https://www.springermedizin.de/resource/supplementary/12889_2012_4689_MOESM1_ESM.pdf/9493212)

### A- Causes of death

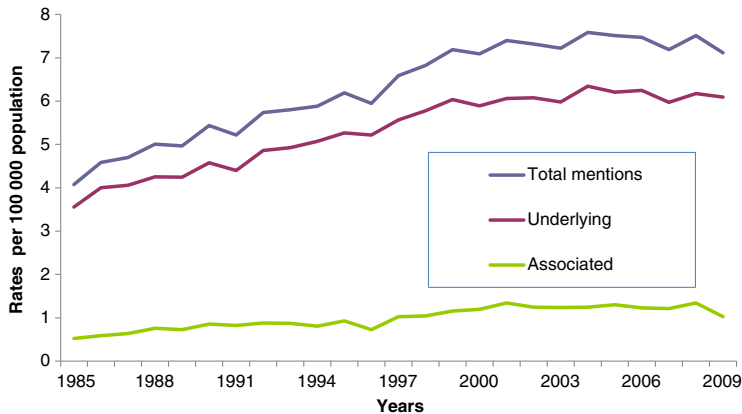

### B- Causes of death and sex

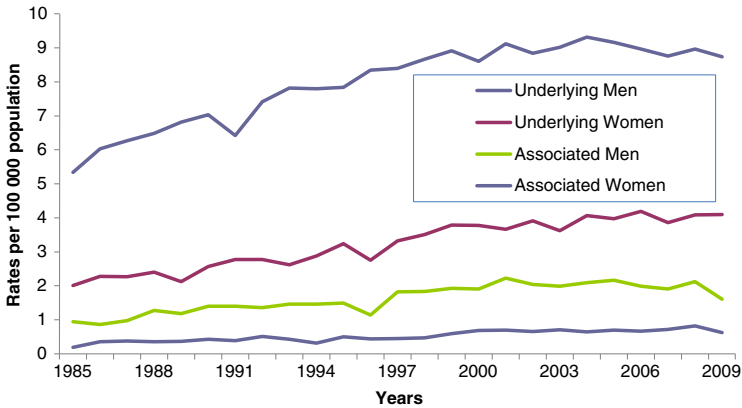

Supplement: MOESM1 [file 9493212]
